# Supplementary material for: Calixarene-supported clusters: employment of complementary cluster ligands for the construction of a ferromagnetic [Mn5] cage
Source: Royal Society of Chemistry journal article supplement (doi:10.1039/c2cc35944h), 2012-01-01
Supplement: c2cc35944h.pdf [file c2cc35944h.pdf]

## Supporting Information

Stephanie M. Taylor,<sup>a</sup> Ruairaidh D. McIntosh,<sup>b</sup> Stergios Piligkos,<sup>c</sup> Scott J. Dalgarno<sup>\*,b</sup>  
and Euan K. Brechin<sup>\*,a</sup>

- Additional figures relating to the extended structure of **1**.

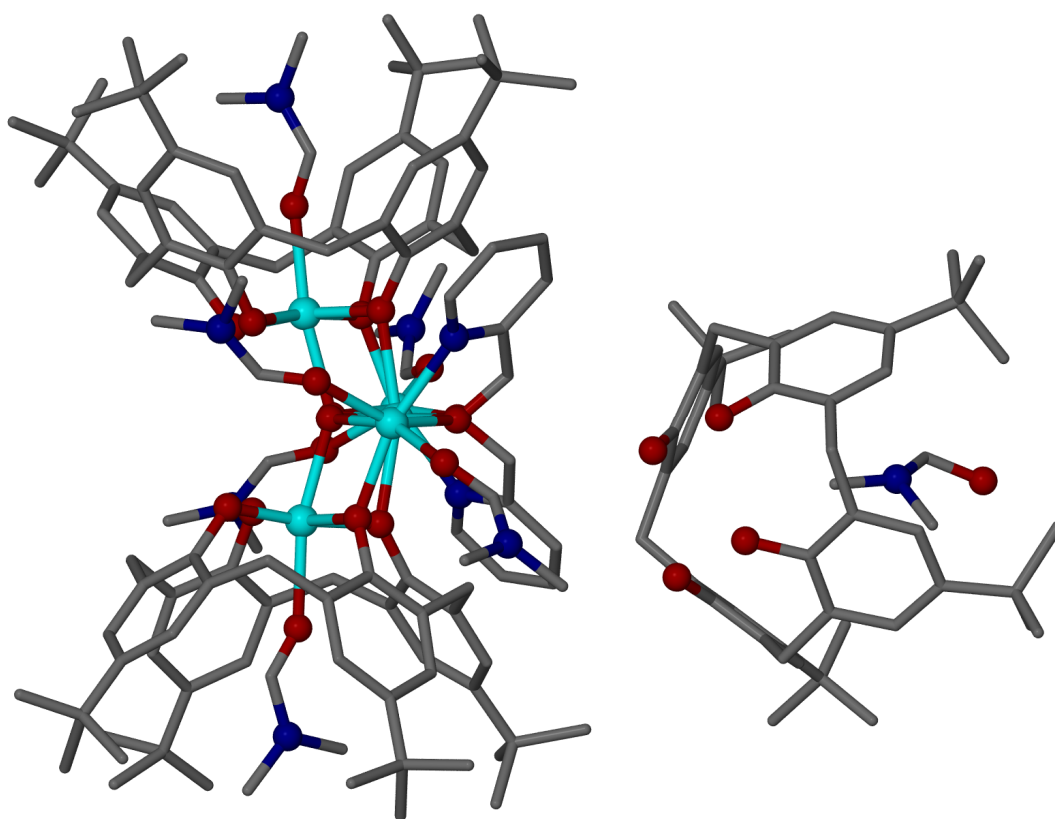

**Figure S1.** Orthogonal arrangement of the (TBC[4]-H) anion relative to the cation in the asymmetric unit of **1**. Hydrogen atoms and (disordered) ligated / co-crystallised solvent molecules omitted for clarity. Colour code: C – grey, N – dark blue, O – red, Mn – pale blue.

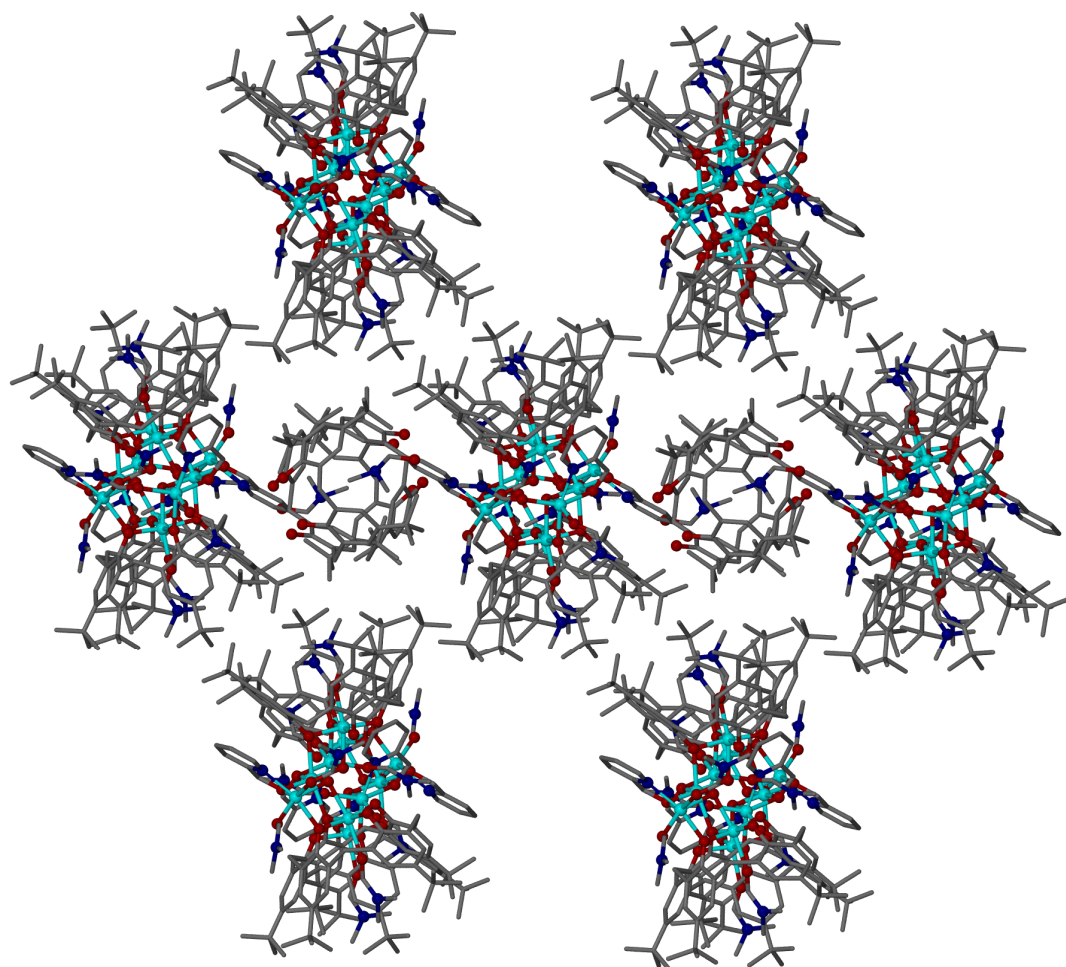

**Figure S2.** Extended structure of **1** showing the layer-like structure formed by cations. Hydrogen atoms and (disordered) ligated / co-crystallised solvent molecules omitted for clarity. Colour code as for Figure S1.

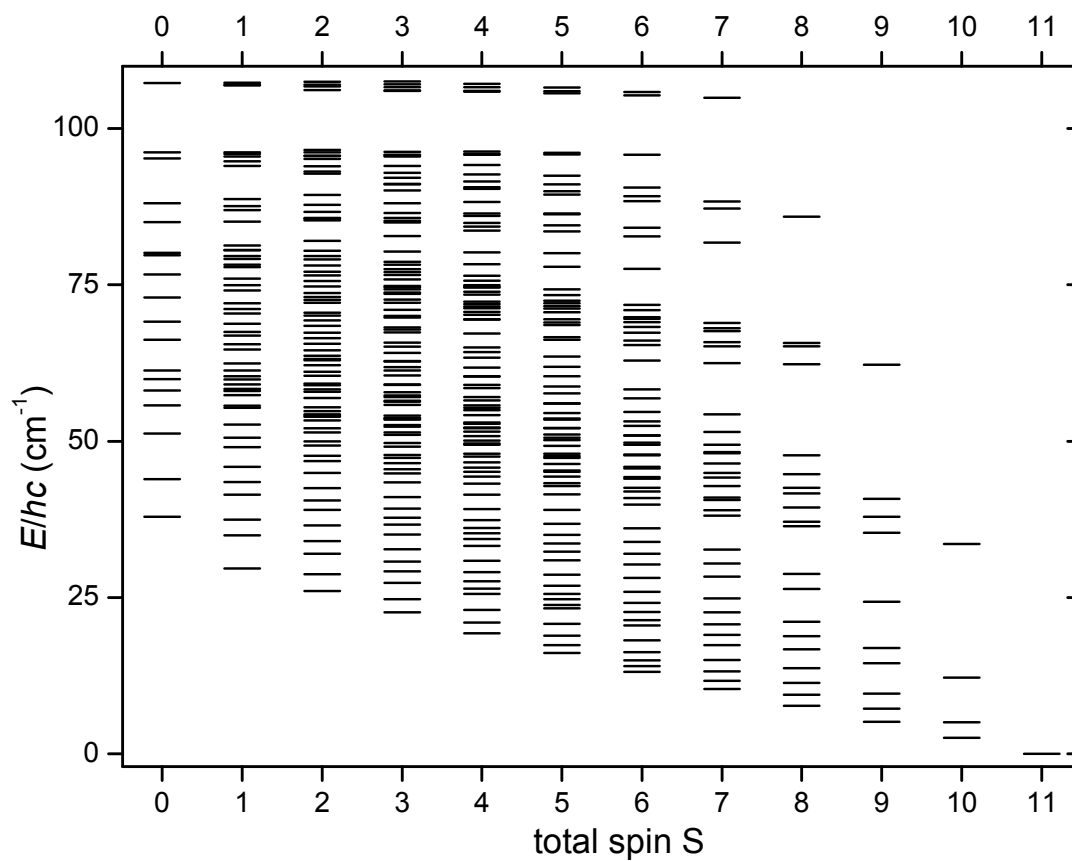

**Figure S3.** Zero-field energy spectrum of **1**, obtained by diagonalisation of the isotropic part of spin-Hamiltonian (1) with  $J_1 = +0.348 \text{ cm}^{-1}$  and  $J_2 = +2.553 \text{ cm}^{-1}$ .

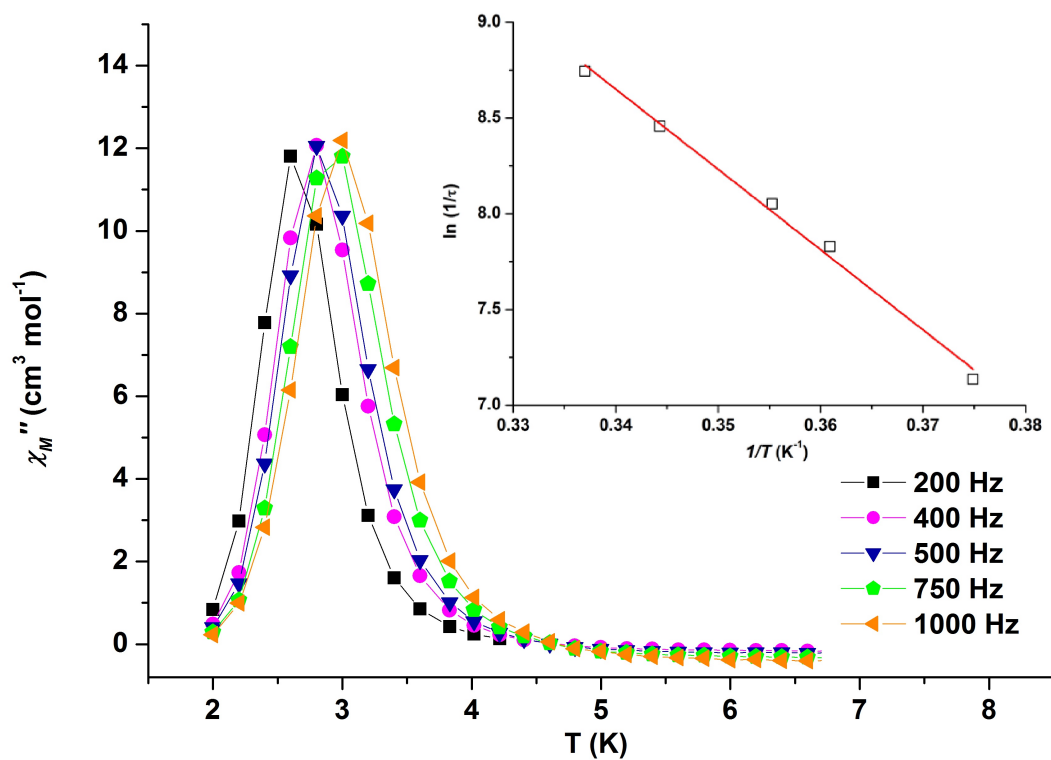

**Figure S4.** Ac susceptibility studies carried out on crystalline samples of **1** in the 1.8-10.0 K range in a 3.5 G field oscillating at frequencies up to 1000 Hz. Insert: Arrhenius plot constructed from these data afford  $U_{\text{eff}} = 42$  K with  $\tau_0 = 1.125 \times 10^{-10}$  s
